# Supplementary material
Source: Springer Nature journal article supplement (https://www.springermedizin.de/resource/supplementary/12913_2008_818_MOESM3_ESM.pdf/9535648)

## Discharge destinations

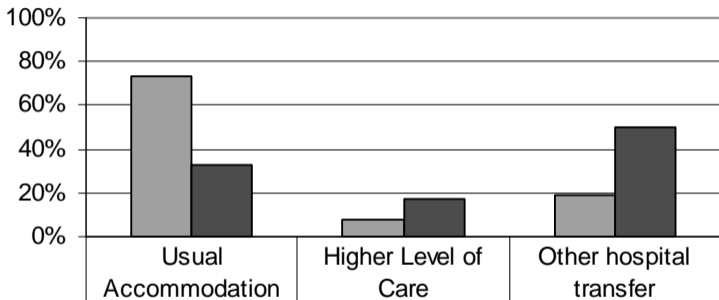

■ FMP Group

73%

8%

19%

■ Usual Care Group

33%

17%

50%

Supplement: MOESM3 [file 9535648]
